# Supplementary material
Source: PubMed Central journal article supplement (PMC3518311)
Supplement: NIHMS278000-supplement-1_si_001.pdf [file NIHMS278000-supplement-1_si_001.pdf]

## SUPPORTING INFORMATION FOR

### **Polarized Molecular Orbital Model Chemistry. I. Ab Initio Foundations**

Luke Fiedler, Jiali Gao,\* and Donald G. Truhlar\*  
*Department of Chemistry and Supercomputing Institute,  
University of Minnesota, 207 Pleasant Street S.E.,  
Minneapolis, MN 55455-0431*

\*Email: [gao@jialigao.org](mailto:gao@jialigao.org) and [truhlar@umn.edu](mailto:truhlar@umn.edu)

This supporting information was updated with final changes on Jan. 4, 2011  
Length including this page: 5 pages

Supplemental Table S1 on the following pages gives the full set of polarizabilities calculated for the present work. Notice that for PM6 we give two values, the second calculated directly, as for the other NDDO methods, and the first containing a post-SCF empirical correction based on additional atomic parameters (see

[http://www.openmopac.net/Polarizability\\_table.html](http://www.openmopac.net/Polarizability_table.html) (accessed Nov. 6, 2010)

for an explanation). The post-SCF correction is not relevant to the question of including polarization effects self-consistently in an NDDO calculation for modeling induction interactions by molecular orbital theory, and hence only the results without atomic corrections are included in the article proper. Since standard computer codes that include PM6 print polarizabilities containing the empirical corrections, the reader should be forewarned that this is not the result calculated directly from the NDDO wave function.

The Hartree-Fock calculations and the semiempirical molecular orbital calculations were all carried out with consistently optimized geometries. That is, for example, the HF/STO-3G(P) polarizabilities were calculated at geometries optimized by HF/STO-3G(P), and the AM1 polarizabilities were calculated at geometries optimized by AM1. The MP2 reference calculations were carried out at HF/STO-3G geometries for consistency with the basis set tests.

**Supplemental Table S1.** Calculated polarizabilities using various basis sets with Hartree-Fock theory and using various semiempirical theories. All polarizabilities are given in Å<sup>3</sup>.

|                                                    | Water | Methanol | Propylene | Methylamine | Acetone | Acetamide | Ethanol |
|----------------------------------------------------|-------|----------|-----------|-------------|---------|-----------|---------|
| <b>Hartree-Fock with the following basis sets:</b> |       |          |           |             |         |           |         |
| STO-3G                                             | 0.40  | 1.18     | 2.47      | 1.41        | 2.56    | 2.36      | 1.99    |
| STO-3G+                                            | 0.76  | 1.89     | 4.38      | 2.30        | 4.24    | 4.10      | 3.19    |
| STO-3G++                                           | 0.83  | 1.96     | 4.65      | 2.44        | 4.33    | 4.18      | 3.26    |
| STO-3G(.P)                                         | 0.81  | 2.42     | 4.85      | 3.00        | 4.62    | 3.97      | 3.96    |
| STO-3G+(.P)                                        | 1.25  | 2.86     | 5.67      | 3.47        | 5.47    | 5.02      | 4.51    |
| STO-3G++(.P)                                       | 1.27  | 2.87     | 5.74      | 3.50        | 5.49    | 5.06      | 4.50    |
| STO-3G(.p)                                         | 0.50  | 1.44     | 2.90      | 1.74        | 2.98    | 2.69      | 2.39    |
| STO-3G(.pP)                                        | 0.84  | 2.50     | 4.99      | 3.10        | 4.75    | 4.08      | 4.09    |
| STO-3G(D,P)                                        | 1.01  | 2.62     | 5.16      | 3.21        | 5.18    | 4.67      | 4.22    |
| STO-3G(P,P)                                        | 0.91  | 2.71     | 5.34      | 3.23        | 5.35    | 4.83      | 4.33    |
| STO-3G(S,P)                                        | 1.02  | 2.62     | 5.34      | 3.30        | 5.17    | 4.59      | 4.26    |
| 3-21G                                              | 0.60  | 2.05     | 4.29      | 2.54        | 4.52    | 3.86      | 3.54    |
| 3-21+G                                             | 0.82  | 2.35     | 5.07      | 2.91        | 5.18    | 4.71      | 3.95    |
| 3-21++G                                            | 0.86  | 2.41     | 5.16      | 3.01        | 5.27    | 4.77      | 4.04    |
| 3-21G(.P)                                          | 0.93  | 2.54     | 5.09      | 3.19        | 5.09    | 4.46      | 4.19    |
| 3-21+G(.P)                                         | 1.15  | 2.78     | 5.61      | 3.46        | 5.62    | 5.09      | 4.48    |
| 3-21++G(.P)                                        | 1.16  | 2.80     | 5.64      | 3.49        | 5.64    | 5.11      | 4.50    |
| 3-21G(.p)                                          | 0.70  | 2.20     | 4.49      | 2.73        | 4.70    | 4.04      | 3.73    |
| 3-21G(.pP)                                         | 0.97  | 2.60     | 5.15      | 3.26        | 5.15    | 4.53      | 4.26    |
| 3-21G(D,P)                                         | 1.10  | 2.74     | 5.43      | 3.36        | 5.48    | 4.96      | 4.40    |
| STO-3G(d)                                          | 0.50  | 1.33     | 2.65      | 1.56        | 2.83    | 2.64      | 2.20    |
| 3-21G(d)                                           | 0.70  | 2.13     | 4.32      | 2.59        | N/A     | 3.97      | N/A     |
| 3-21+G(d)                                          | 0.91  | 2.42     | 5.11      | 2.95        | 5.22    | 4.78      | 4.01    |
| 3-(21,3,3)G                                        | 0.41  | 1.27     | 2.70      | 1.50        | 2.82    | 2.60      | 2.13    |
| cc-pVDZ                                            | 0.79  | 2.33     | 4.81      | 2.88        | 5.02    | 4.39      | 3.94    |
| aug-cc-pVDZ                                        | 1.26  | 2.94     | 5.76      | 3.60        | 5.84    | 5.38      | 4.65    |
| 3-(21,21,3)G                                       | 0.48  | 1.46     | 3.30      | 1.78        | 3.53    | 3.19      | 2.57    |
| 3-(21,3,21)G                                       | 0.80  | 2.32     | 4.35      | 2.85        | 5.18    | 4.77      | 3.89    |
| 3-(21,3,3)G(.P)                                    | 1.15  | 3.23     | 5.69      | 3.84        | 6.28    | 5.65      | 5.19    |
| 3-(3,21,21)G                                       | 0.89  | 2.81     | 5.32      | 2.61        | 6.29    | 4.63      | 4.85    |
| aug'-cc-pVDZ                                       | 1.16  | 2.85     | 5.70      | 3.49        | 5.79    | 5.32      | 4.56    |
| aug''-cc-pVDZ                                      | 0.87  | 2.41     | 5.17      | 3.02        | 5.28    | 4.82      | 4.04    |
| STO-3G(.P!)                                        | 0.81  | 1.41     | 2.47      | 2.02        | 2.56    | 2.96      | 2.25    |
| STO-3G(.P*)                                        | 0.81  | 1.41     | 3.84      | 2.02        | 2.56    | 2.96      | 2.25    |
| STO-3G(.P')                                        | 0.83  | 2.36     | 4.80      | 2.95        | 4.53    | 4.08      | 3.85    |
| STO-3G(.P'')                                       | 0.82  | 2.43     | 4.87      | 3.01        | 4.62    | 4.01      | 3.96    |
| <b>Semiempirical methods:</b>                      |       |          |           |             |         |           |         |
| MNDO                                               | 0.43  | 1.72     | 3.77      | 2.10        | 3.87    | 3.57      | 2.89    |
| AM1                                                | 0.50  | 1.82     | 3.86      | 2.17        | 4.00    | 3.67      | 3.04    |
| PM3                                                | 0.50  | 1.62     | 3.44      | 2.01        | 3.63    | 3.66      | 2.70    |
| RM1                                                | 0.50  | 1.74     | 3.68      | 2.13        | 3.81    | 3.59      | 2.90    |
| PM6 (with empirical correction)                    | 1.35  | 3.25     | 6.04      | 3.79        | 6.39    | 5.84      | 5.06    |
| PM6 (no empirical correction)                      | 0.30  | 1.18     | 2.64      | 1.42        | 2.84    | 2.82      | 1.99    |
| <b>Reference Polarizability:</b>                   |       |          |           |             |         |           |         |
|                                                    | 1.45  | 3.23     | 6.26      | 4.01        | 6.33    | 5.67      | 5.11    |

| Diethylamine | Acetaldehyde | Isopropanol | Methane | Methane<br>thiol<br>CH3SH | Dimethyl<br>sulfide<br>DMS | Dimethyl<br>ether<br>DME | CO2  | HCN  | Acetylene<br>C2H2 | Methyl<br>acetylene<br>CH3CCH |
|--------------|--------------|-------------|---------|---------------------------|----------------------------|--------------------------|------|------|-------------------|-------------------------------|
| 3.86         | 1.76         | 2.75        | 0.82    | 1.73                      | 2.63                       | 1.99                     | 0.97 | 0.86 | 1.06              | 1.99                          |
| 3.86         | 3.06         | 4.50        | 1.17    | 3.63                      | 5.29                       | 3.20                     | 1.95 | 1.73 | 2.41              | 3.70                          |
| 6.41         | 3.08         | 4.61        | 1.34    | 3.84                      | 5.61                       | 3.26                     | 1.95 | 1.76 | 2.54              | 3.86                          |
| 7.75         | 3.15         | 5.35        | 2.00    | 3.48                      | 5.17                       | 4.11                     | 0.97 | 1.17 | 1.96              | 3.72                          |
| 8.49         | 3.93         | 6.05        | 2.25    | 4.87                      | 6.83                       | 4.56                     | 1.95 | 1.92 | 2.97              | 4.51                          |
| 7.93         | 3.92         | 6.05        | 2.26    | 4.92                      | 6.95                       | 4.54                     | 1.95 | 1.93 | 2.77              | 4.59                          |
| 4.64         | 2.03         | 3.29        | 1.10    | 2.00                      | 3.06                       | 2.41                     | 0.97 | 0.92 | 1.22              | 2.30                          |
| 8.00         | 3.23         | 5.52        | 2.08    | 3.57                      | 5.31                       | 4.25                     | 0.97 | 1.19 | 2.01              | 3.82                          |
| 8.13         | 3.59         | 5.75        | 2.03    | 4.24                      | 5.98                       | 4.23                     | 1.61 | 1.84 | 2.60              | 4.39                          |
| 8.24         | 3.73         | 5.84        | 2.03    | 4.23                      | 6.26                       | 4.48                     | 1.72 | 1.58 | 2.26              | 4.18                          |
| 8.24         | 3.55         | 5.78        | 2.20    | 3.90                      | 5.69                       | 4.34                     | 1.25 | 1.48 | 2.34              | 4.17                          |
| 7.01         | 3.11         | 4.91        | 1.70    | 3.51                      | 5.10                       | 3.51                     | 1.47 | 1.50 | 1.84              | 3.47                          |
| 7.77         | 3.64         | 5.54        | 1.81    | 4.04                      | 5.78                       | 3.92                     | 1.94 | 1.93 | 2.47              | 4.14                          |
| 7.93         | 3.69         | 5.65        | 1.88    | 4.15                      | 5.92                       | 4.02                     | 1.94 | 1.93 | 2.47              | 4.20                          |
| 8.22         | 3.50         | 5.74        | 2.19    | 4.23                      | 5.88                       | 4.22                     | 1.47 | 1.63 | 2.15              | 4.02                          |
| 8.64         | 3.94         | 6.13        | 2.28    | 4.68                      | 6.46                       | 4.49                     | 1.94 | 2.00 | 2.65              | 4.48                          |
| 8.66         | 3.96         | 6.14        | 2.30    | 4.75                      | 6.54                       | 4.52                     | 1.94 | 2.00 | 2.61              | 4.50                          |
| 7.38         | 3.23         | 5.17        | 1.84    | 3.66                      | 5.32                       | 3.71                     | 1.47 | 1.53 | 1.93              | 3.62                          |
| 8.34         | 3.55         | 5.83        | 2.23    | 4.28                      | 5.95                       | 4.27                     | 1.47 | 1.64 | 2.18              | 4.08                          |
| 8.44         | 3.86         | 6.00        | 2.23    | 4.69                      | 6.40                       | 4.44                     | 2.01 | 2.13 | 2.99              | 4.76                          |
| 4.22         | 1.95         | 3.04        | 0.89    | 1.93                      | 2.87                       | 2.19                     | 1.16 | 0.98 | 1.22              | 2.22                          |
| N/A          | N/A          | N/A         | N/A     | N/A                       | N/A                        | 3.57                     | 1.61 | 1.57 | 1.94              | 4.50                          |
| 7.78         | 3.70         | 5.59        | 1.82    | N/A                       | N/A                        | 3.97                     | 2.06 | 2.01 | 2.59              | 4.27                          |
| 4.14         | 1.94         | 2.95        | 0.88    | 3.51                      | 5.10                       | 2.16                     | 1.15 | 1.08 | 1.34              | 2.35                          |
| 7.76         | 3.49         | 5.48        | 1.90    | 3.87                      | 5.58                       | 3.92                     | 1.77 | 1.82 | 2.32              | 4.04                          |
| 8.80         | 4.18         | 6.32        | 2.34    | 5.08                      | 6.86                       | 4.66                     | 2.36 | 2.43 | 3.25              | 5.06                          |
| 5.12         | 2.43         | 3.65        | 0.99    | 2.69                      | 4.05                       | 2.44                     | 1.47 | 1.45 | 1.75              | 2.89                          |
| 7.76         | 3.51         | 5.52        | 1.65    | 3.41                      | 5.06                       | 3.93                     | 1.61 | 1.59 | 1.86              | 3.63                          |
| 10.04        | 4.34         | 7.04        | 2.32    | 4.54                      | 6.47                       | 5.32                     | 1.61 | 1.81 | 2.44              | 4.63                          |
| 8.63         | 4.22         | 6.82        | 2.13    | 3.81                      | 5.95                       | 4.68                     | 1.90 | 1.68 | 2.28              | 4.58                          |
| 8.70         | 4.13         | 6.24        | 2.28    | 5.00                      | 6.77                       | 4.58                     | 2.36 | 2.43 | 3.25              | 5.03                          |
| 7.94         | 3.71         | 5.67        | 1.86    | 4.13                      | 5.91                       | 4.02                     | 1.97 | 1.95 | 2.51              | 4.22                          |
| 4.21         | 1.76         | 3.01        | 0.82    | 2.28                      | 2.63                       | 1.99                     | 0.97 | 0.86 | 1.06              | 1.99                          |
| 4.21         | 2.20         | 3.01        | 0.82    | 2.28                      | 2.63                       | 1.99                     | 0.97 | 1.17 | 1.96              | 2.55                          |
| 7.48         | 2.99         | 5.16        | 1.82    | 3.57                      | 5.23                       | 3.94                     | 0.98 | 1.13 | 1.99              | 3.67                          |
| 7.76         | 3.13         | 5.35        | 1.98    | 3.52                      | 5.22                       | 4.11                     | 0.98 | 1.17 | 1.98              | 3.74                          |
| 5.75         | 2.72         | 4.01        | 1.28    | 2.70                      | 3.94                       | 3.04                     | 1.68 | 1.36 | 1.75              | 3.22                          |
| 5.97         | 2.83         | 4.16        | 1.31    | 2.93                      | 4.31                       | 3.17                     | 1.66 | 1.40 | 1.77              | 3.34                          |
| 5.28         | 2.60         | 3.69        | 1.12    | 2.69                      | 3.96                       | 2.76                     | 1.69 | 1.50 | 1.75              | 3.11                          |
| 5.82         | 2.70         | 3.95        | 1.19    | 3.09                      | 4.36                       | 2.98                     | 1.65 | 1.32 | 1.78              | 3.27                          |
| 9.35         | 4.58         | 6.86        | 2.67    | 5.59                      | 7.61                       | 5.16                     | 2.75 | 2.47 | 3.32              | 5.40                          |
| 3.95         | 2.03         | 2.78        | 0.76    | 2.23                      | 3.24                       | 2.08                     | 1.58 | 1.15 | 1.46              | 2.52                          |
| 9.61         | 4.59         | 7.61        | 2.59    | 5.49                      | 7.39                       | 5.16                     | 2.91 | 2.59 | 3.33              | 6.18                          |

Table S1

| Ethylene<br>C2H4 | HCl  | Acetyl<br>chloride<br>CH3Cl | Acetyl<br>chloride<br>CH3C(O)Cl | Acetonitrile<br>CH3CN | Glycine<br>HO2CCH2NH2 | <i>s-trans</i> -<br>butadiene<br>C4H6 | Benzene<br>C6H6 | Toluene<br>C6H5CH3 | Water dimer<br>H2O .. H2O | Pyridine<br>C5H5N |
|------------------|------|-----------------------------|---------------------------------|-----------------------|-----------------------|---------------------------------------|-----------------|--------------------|---------------------------|-------------------|
| 1.59             | 0.42 | 1.34                        | 2.39                            | 1.72                  | 2.70                  | 3.72                                  | 4.75            | 5.71               | 0.87                      | 4.39              |
| 3.02             | 0.97 | 2.36                        | 4.43                            | 2.98                  | 4.62                  | 7.04                                  | 8.85            | 10.14              | 1.65                      | 8.05              |
| 3.07             | 1.00 | 2.48                        | 4.46                            | 3.06                  | 4.66                  | 7.42                                  | 9.30            | 10.61              | 1.77                      | 8.29              |
| 3.22             | 0.74 | 2.37                        | 3.40                            | 2.71                  | 4.26                  | 6.62                                  | 7.82            | 9.55               | 1.83                      | 6.91              |
| 3.94             | 1.41 | 3.21                        | 5.10                            | 3.67                  | 5.47                  | 8.07                                  | 9.73            | 11.48              | 2.49                      | 8.82              |
| 3.95             | 1.41 | 3.28                        | 5.09                            | 3.69                  | 5.51                  | 8.17                                  | 9.85            | 11.61              | 2.52                      | 8.88              |
| 1.87             | 0.47 | 1.54                        | 2.59                            | 1.93                  | 3.01                  | 4.18                                  | 5.19            | 6.31               | 1.09                      | 4.75              |
| 3.31             | 0.76 | 2.44                        | 3.47                            | 2.78                  | 4.36                  | 6.78                                  | 7.96            | 9.74               | 1.86                      | 7.03              |
| 3.46             | 1.57 | 3.25                        | 4.85                            | 3.44                  | 5.18                  | 7.22                                  | 8.86            | 10.67              | 2.18                      | 8.10              |
| 3.51             | 0.89 | 2.89                        | 4.70                            | 3.35                  | 5.25                  | 7.72                                  | 9.39            | 11.16              | 2.10                      | 8.58              |
| 3.63             | 0.98 | 2.68                        | 4.09                            | 3.15                  | 4.86                  | 7.39                                  | 8.84            | 10.59              | 2.19                      | 7.83              |
| 2.73             | 0.95 | 2.66                        | 4.29                            | 3.01                  | 4.16                  | 5.93                                  | 7.19            | 8.83               | 1.27                      | 6.63              |
| 3.38             | 1.22 | 3.04                        | 5.12                            | 3.53                  | 5.14                  | 7.35                                  | 8.95            | 10.62              | 1.77                      | 8.22              |
| 3.43             | 1.24 | 3.09                        | 5.17                            | 3.57                  | 5.19                  | 7.39                                  | 8.98            | 10.70              | 1.83                      | 8.25              |
| 3.36             | 1.29 | 3.05                        | 4.58                            | 3.32                  | 4.80                  | 6.92                                  | 8.24            | 10.09              | 1.97                      | 7.46              |
| 3.86             | 1.58 | 3.40                        | 5.37                            | 3.78                  | 5.52                  | 7.89                                  | 9.44            | 11.24              | 2.33                      | 8.65              |
| 3.87             | 1.60 | 3.44                        | 5.38                            | 3.80                  | 5.53                  | 7.91                                  | 9.47            | 11.27              | 2.34                      | 8.67              |
| 2.87             | 1.01 | 2.77                        | 4.38                            | 3.11                  | 4.35                  | 6.14                                  | 7.39            | 9.10               | 1.47                      | 6.79              |
| 3.39             | 1.30 | 3.09                        | 4.61                            | 3.36                  | 4.88                  | 6.98                                  | 8.28            | 10.15              | 2.03                      | 7.50              |
| 3.71             | 2.11 | 3.82                        | 5.62                            | 3.81                  | 5.42                  | 7.58                                  | 9.28            | 11.09              | 2.27                      | 8.52              |
| 1.70             | 0.69 | 1.64                        | 2.82                            | 1.91                  | 3.06                  | 3.94                                  | 5.14            | 6.19               | 1.09                      | 4.78              |
| 2.78             | N/A  | N/A                         | N/A                             | 3.08                  | 4.34                  | 5.98                                  | 7.39            | 9.02               | 1.48                      | 6.83              |
| 3.42             | N/A  | N/A                         | N/A                             | 3.62                  | 5.27                  | 7.41                                  | 9.17            | 10.85              | 1.96                      | 8.47              |
| 1.75             | 0.95 | 2.66                        | 4.29                            | 2.02                  | 2.93                  | 4.12                                  | 5.19            | 6.23               | 0.88                      | 4.84              |
| 3.15             | 1.29 | 3.03                        | 4.81                            | 3.42                  | 4.78                  | 6.70                                  | 8.24            | 9.99               | 1.66                      | 7.61              |
| 4.01             | 2.34 | 4.12                        | 6.13                            | 4.18                  | 5.90                  | 8.10                                  | 9.95            | 11.79              | 2.56                      | 9.19              |
| 2.13             | 0.74 | 2.16                        | 3.81                            | 2.54                  | 3.60                  | 5.03                                  | 6.33            | 7.60               | 1.00                      | 5.91              |
| 2.69             | 1.28 | 2.93                        | 4.98                            | 3.16                  | 5.24                  | 5.88                                  | 7.45            | 9.25               | 1.99                      | 7.00              |
| 3.65             | 1.74 | 3.64                        | 5.51                            | 3.75                  | 6.49                  | 7.62                                  | 9.13            | 11.37              | 2.78                      | 8.46              |
| 3.20             | 0.69 | 2.87                        | 5.08                            | 3.68                  | 5.24                  | 6.97                                  | 8.53            | 10.88              | 2.10                      | 7.57              |
| 3.96             | 2.28 | 4.07                        | 6.10                            | 4.15                  | 5.84                  | 8.05                                  | 9.91            | 11.72              | 2.39                      | 9.15              |
| 3.48             | 1.22 | 3.07                        | 5.20                            | 3.58                  | 5.24                  | 7.42                                  | 9.03            | 10.74              | 1.88                      | 8.31              |
| 1.59             | 0.74 | 1.34                        | 2.39                            | 1.72                  | 3.58                  | 3.72                                  | 4.75            | 5.71               | 1.83                      | 4.39              |
| 3.22             | 0.74 | 1.34                        | 2.39                            | 1.72                  | 3.58                  | 6.62                                  | 7.82            | 8.40               | 1.83                      | 6.91              |
| 3.25             | 0.64 | 2.23                        | 3.37                            | 2.59                  | 4.33                  | 6.92                                  | 8.19            | 9.85               | 1.94                      | 7.16              |
| 3.25             | 0.72 | 2.36                        | 3.41                            | 2.70                  | 4.29                  | 6.72                                  | 7.92            | 9.65               | 1.86                      | 6.98              |
| 2.43             | 0.67 | 1.99                        | 3.77                            | 2.67                  | 3.95                  | 5.73                                  | 7.23            | 8.62               | 0.86                      | 6.70              |
| 2.47             | 0.60 | 1.98                        | 3.82                            | 2.80                  | 4.15                  | 5.73                                  | 7.22            | 8.66               | 1.03                      | 6.76              |
| 2.22             | 0.80 | 2.08                        | 4.12                            | 2.76                  | 3.96                  | 5.22                                  | 6.76            | 8.02               | 1.12                      | 6.46              |
| 2.35             | 0.59 | 2.03                        | 3.88                            | 2.62                  | 4.08                  | 5.54                                  | 6.94            | 8.31               | 1.02                      | 6.54              |
| 4.12             | 2.34 | 4.34                        | 6.73                            | 4.44                  | 6.47                  | 8.17                                  | 10.17           | 12.13              | 2.40                      | 9.38              |
| 1.73             | 0.47 | 1.46                        | 3.21                            | 2.11                  | 3.31                  | 4.29                                  | 5.31            | 6.27               | 0.67                      | 5.07              |
| 4.25             | 2.63 | 4.72                        | 6.62                            | 4.48                  | 6.52                  | 8.64                                  | 10.32           | 12.26              | 2.88                      | 9.18              |

Table S1

| Benzaldehyde<br>PhCHO | Benzyl alcohol<br>BzOH | Phenol<br>PhOH | Nicotinamide<br>C6H6N2O | Pyrimidine<br>C4H4N2 | Purine<br>C5H4N4 | Vinyl alcohol<br>C2H3OH | Ethane<br>C2H6 | Propane<br>C3H8 |
|-----------------------|------------------------|----------------|-------------------------|----------------------|------------------|-------------------------|----------------|-----------------|
| 6.06                  | 6.09                   | 5.24           | 6.28                    | 4.04                 | 6.11             | 1.96                    | 1.61           | 2.41            |
| 10.77                 | 10.73                  | 9.38           | 10.91                   | 7.21                 | 10.34            | 3.68                    | 2.45           | 3.81            |
| 11.11                 | 11.14                  | 9.74           | 11.06                   | 7.35                 | 10.41            | 3.78                    | 2.66           | 4.00            |
| 9.09                  | 9.84                   | 8.10           | 9.06                    | 6.02                 | 8.18             | 3.46                    | 3.58           | 5.11            |
| 11.63                 | 11.98                  | 10.21          | 11.76                   | 7.88                 | 11.08            | 4.47                    | 3.90           | 5.54            |
| 11.74                 | 12.09                  | 10.31          | 11.81                   | 7.92                 | 11.10            | 4.49                    | 3.91           | 5.54            |
| 6.49                  | 6.66                   | 5.67           | 6.68                    | 4.31                 | 6.39             | 2.22                    | 2.03           | 2.97            |
| 9.23                  | 10.03                  | 8.24           | 9.20                    | 6.11                 | 8.28             | 3.55                    | 3.70           | 5.28            |
| 10.86                 | 11.19                  | 9.49           | 11.13                   | 7.30                 | 10.51            | 3.97                    | 3.68           | 5.28            |
| 11.36                 | 11.69                  | 9.83           | 11.53                   | 7.72                 | 10.87            | 4.09                    | 3.68           | 5.30            |
| 10.26                 | 10.93                  | 9.17           | 10.35                   | 6.85                 | 9.44             | 3.96                    | 3.81           | 5.42            |
| 9.00                  | 9.17                   | 7.66           | 9.15                    | 6.04                 | 8.74             | 3.07                    | 3.16           | 4.60            |
| 11.04                 | 11.13                  | 9.47           | 11.27                   | 7.49                 | 10.71            | 3.88                    | 3.39           | 4.98            |
| 11.06                 | 11.19                  | 9.50           | 11.31                   | 7.51                 | 10.73            | 3.93                    | 3.50           | 5.12            |
| 9.97                  | 10.43                  | 8.67           | 10.16                   | 6.67                 | 9.42             | 3.67                    | 3.81           | 5.42            |
| 11.49                 | 11.71                  | 9.94           | 11.73                   | 7.83                 | 11.05            | 4.32                    | 3.96           | 5.64            |
| 11.51                 | 11.74                  | 9.96           | 11.76                   | 7.84                 | 11.06            | 4.33                    | 3.97           | 5.66            |
| 9.19                  | 9.44                   | 7.86           | 9.36                    | 6.16                 | 8.87             | 3.21                    | 3.36           | 4.85            |
| 10.01                 | 10.51                  | 8.73           | 10.22                   | 6.70                 | 9.46             | 3.73                    | 3.87           | 5.50            |
| 11.38                 | 11.59                  | 9.88           | 11.64                   | 7.70                 | 10.98            | 4.21                    | 3.87           | 5.51            |
| 6.61                  | 6.66                   | 5.74           | 6.92                    | 4.41                 | 6.74             | 2.16                    | 1.74           | 2.61            |
| 9.26                  | 9.43                   | 7.93           | 9.46                    | 6.23                 | 9.06             | 3.18                    | 3.16           | 4.59            |
| 11.32                 | 11.44                  | 9.76           | 11.59                   | 7.73                 | 11.09            | 4.00                    | 3.39           | 4.97            |
| 6.68                  | 6.65                   | 5.74           | 6.94                    | 4.48                 | 6.79             | 2.16                    | 1.71           | 2.56            |
| 10.24                 | 10.42                  | 8.78           | 10.45                   | 6.91                 | 9.97             | 3.57                    | 3.50           | 5.08            |
| 12.09                 | 12.29                  | 10.59          | 12.19                   | 8.36                 | 11.89            | 4.59                    | 4.02           | 5.72            |
| 8.17                  | 8.06                   | 6.88           | 8.41                    | 5.48                 | 8.21             | 2.59                    | 2.09           | 3.19            |
| 9.59                  | 9.96                   | 8.31           | 10.41                   | 6.46                 | 9.73             | 3.35                    | 3.19           | 4.72            |
| 11.40                 | 12.25                  | 10.14          | 12.21                   | 7.65                 | 11.16            | 4.45                    | 4.26           | 6.20            |
| 11.12                 | 11.70                  | 9.57           | 10.52                   | 6.44                 | 8.75             | 3.92                    | 4.11           | 6.04            |
| 12.06                 | 12.24                  | 10.54          | 12.15                   | 8.34                 | 11.86            | 4.53                    | 3.95           | 5.64            |
| 11.14                 | 11.25                  | 9.58           | 11.05                   | 7.57                 | 10.83            | 3.97                    | 3.49           | 5.12            |
| 6.06                  | 6.38                   | 5.53           | 7.02                    | 4.04                 | 6.11             | 2.18                    | 1.61           | 2.41            |
| 9.09                  | 9.00                   | 8.10           | 9.06                    | 6.02                 | 8.18             | 3.46                    | 1.61           | 2.41            |
| 9.44                  | 10.24                  | 8.51           | 9.44                    | 6.13                 | 8.33             | 3.59                    | 3.30           | 4.75            |
| 9.19                  | 9.96                   | 8.21           | 9.18                    | 6.07                 | 8.25             | 3.50                    | 3.55           | 5.08            |
| 8.96                  | 8.98                   | 8.00           | 9.32                    | 6.13                 | 9.38             | 3.04                    | 2.46           | 3.62            |
| 9.18                  | 9.11                   | 7.98           | 9.46                    | 6.29                 | 9.76             | 3.09                    | 2.56           | 3.74            |
| 8.65                  | 8.47                   | 7.52           | 9.31                    | 6.16                 | 9.81             | 2.87                    | 2.22           | 3.25            |
| 8.85                  | 8.77                   | 7.71           | 9.25                    | 6.11                 | 9.52             | 3.01                    | 2.39           | 3.52            |
| 12.58                 | 12.77                  | 11.06          | 12.96                   | 8.59                 | 12.44            | 4.90                    | 4.48           | 6.28            |
| 7.08                  | 6.75                   | 6.05           | 7.54                    | 4.82                 | 7.77             | 2.35                    | 1.56           | 2.35            |
| 12.80                 | 13.15                  | 11.1           | 12.19                   | 8.53                 | 12.78            | 4.85                    | 4.48           | 6.38            |
